# Supplementary material for: Effect of protein corona on nanoparticle–plasma membrane and nanoparticle–biomimetic membrane interactions
Source: Royal Society of Chemistry journal article supplement (doi:10.1039/d0en00035c), 2020-01-01
Supplement: d0en00035c1.pdf [file d0en00035c1.pdf]

**Supplementary Information for:**

**Effect of protein corona on nanoparticle-plasma membrane and nanoparticle-biomimetic membrane interactions**

Lu Wang,<sup>†</sup> Nicolas Hartel,<sup>†</sup> Kaixuan Ren,<sup>†</sup> Nicholas Alexander Graham,<sup>†</sup> Noah Malmstadt<sup>\*†‡§</sup>

<sup>†</sup> Mork Family Department of Chemical Engineering and Materials Science, 925 Bloom Walk, University of Southern California, Los Angeles, California 90089-1211, United States

<sup>‡</sup> Department of Chemistry, 840 Downey Way, University of Southern California, Los Angeles, California 90089-0744, United States

<sup>§</sup> Department of Biomedical Engineering, 3650 McClintock Avenue, University of Southern California, Los Angeles, California 90089-1111, United States

\*N. Malmstadt. E-mail: [malmstad@usc.edu](mailto:malmstad@usc.edu)

**Table S1.** Representative proteins identified in the protein corona formed on uncharged, carboxyl-, and amine-polystyrene nanoparticles by LC-MS-MS.

| SPNP**    |                                              | CPNP**    |                                              | APNP**    |                        |
|-----------|----------------------------------------------|-----------|----------------------------------------------|-----------|------------------------|
| Acc. no.* | Protein identity                             | Acc. no.* | Protein identity                             | Acc. no.* | Protein identity       |
| P06727    | Apolipoprotein A-IV                          | P02647    | Apolipoprotein A-I                           | P02647    | Apolipoprotein A-I     |
| P02768    | Serum albumin                                | P02649    | Apolipoprotein E                             | P02649    | Apolipoprotein E       |
| P02647    | Apolipoprotein A-I                           | P06727    | Apolipoprotein A-IV                          | P04004    | Vitronectin            |
| P02649    | Apolipoprotein E                             | P01024    | Complement C3                                | P02652    | Apolipoprotein A-II    |
| P01024    | Complement C3                                | P01008    | Antithrombin-III                             | P10909-5  | Isoform 5 of Clusterin |
| P04114    | Apolipoprotein B-100                         | P10909-4  | Isoform 4 of Clusterin                       |           |                        |
| P10909-4  | Isoform 4 of Clusterin                       | P02768    | Serum albumin                                |           |                        |
| P02652    | Apolipoprotein A-II                          | P04004    | Vitronectin                                  |           |                        |
| P01009    | Alpha-1-antitrypsin                          | P00734    | Prothrombin                                  |           |                        |
| P04004    | Vitronectin                                  | P04196    | Histidine-rich glycoprotein                  |           |                        |
| P02654    | Apolipoprotein C-I                           | P02652    | Apolipoprotein A-II                          |           |                        |
| P01008    | Antithrombin-III                             | P02654    | Apolipoprotein C-I                           |           |                        |
| P02774-3  | Isoform 3 of Vitamin D-binding protein       | P04114    | Apolipoprotein B-100                         |           |                        |
| P02655    | Apolipoprotein C-II                          | P55056    | Apolipoprotein C-IV                          |           |                        |
| P00338-4  | Isoform 4 of L-lactate dehydrogenase A chain | Q03591    | Complement factor H-related protein 1        |           |                        |
| P05546    | Heparin cofactor 2                           | P05546    | Heparin cofactor 2                           |           |                        |
| P19827    | Inter-alpha-trypsin inhibitor heavy chain H1 | P19823    | Inter-alpha-trypsin inhibitor heavy chain H2 |           |                        |
| P30101    | Protein disulfide-isomerase A3               | O14791-3  | Isoform 3 of Apolipoprotein L1               |           |                        |
| P00738    | Haptoglobin                                  |           |                                              |           |                        |
| P31146    | Coronin-1A                                   |           |                                              |           |                        |
| P06703    | Protein S100-A6                              |           |                                              |           |                        |
| P17661    | Desmin                                       |           |                                              |           |                        |
| P19823    | Inter-alpha-trypsin inhibitor heavy chain H2 |           |                                              |           |                        |
| P05090    | Apolipoprotein D                             |           |                                              |           |                        |
| P16402    | Histone H1.3                                 |           |                                              |           |                        |
| P07195    | L-lactate dehydrogenase B chain              |           |                                              |           |                        |
| P00734    | Prothrombin                                  |           |                                              |           |                        |

\* Uniprot accession number.

\*\* SPNP: 100 nm sulfate-functionalized polystyrene nanoparticles; CPNP: 100 nm carboxyl-functionalized polystyrene nanoparticles; APNP: 100 nm amine-functionalized polystyrene nanoparticles.

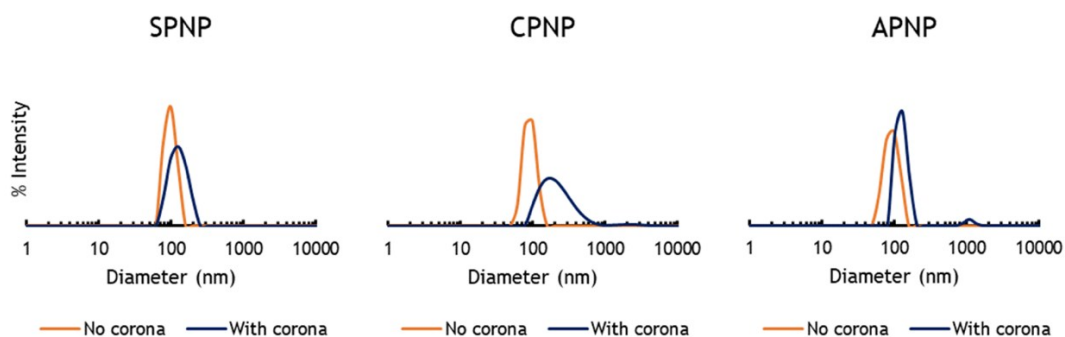

**Figure S1.** Size distribution of polystyrene nanoparticles with and without the presence of a protein corona. Sulfate-PNPs, carboxyl-PNPs, and amine-PNPs are denoted as SPNP, CPNP and APNP.

**Table S2.** Hydrodynamic diameters and Zeta potential of PNPs in FBS-absent cell culture media DMEM and complete media cDMEM.

|                            |              | In DMEM         |                | In cDMEM       |                |
|----------------------------|--------------|-----------------|----------------|----------------|----------------|
|                            |              | Without corona  | With corona    | Without corona | With corona    |
| Hydrodynamic Diameter (nm) | Sulfate-PNP  | 85.86 ± 4.15    | 114.63 ± 12.78 | 104.85 ± 10.00 | 106.14 ± 20.58 |
|                            | Carboxyl-PNP | 95.62 ± 10.22   | 136.04 ± 28.79 | 101.64 ± 12.72 | 124.03 ± 35.92 |
|                            | Amine-PNP    | 645.96 ± 107.95 | 135.13 ± 18.53 | 123.53 ± 31.81 | 128.26 ± 35.42 |
| Zeta potential (mV)        | Sulfate-PNP  | -30.39 ± 1.43   | -12.14 ± 2.56  | -7.00 ± 4.12   | -6.65 ± 5.53   |
|                            | Carboxyl-PNP | -25.70 ± 1.64   | -8.78 ± 6.11   | -11.45 ± 5.05  | -8.97 ± 4.98   |
|                            | Amine-PNP    | -5.30 ± 12.79   | -10.45 ± 3.65  | -10.78 ± 0.76  | -12.39 ± 4.38  |

**Table S3.** Unpaired t-test result of viability MTT assay.

| PNP  | Time | Level 1      | Level 2      | Mean 1  | Mean 2  | Mean Difference | P-value | P value summary |
|------|------|--------------|--------------|---------|---------|-----------------|---------|-----------------|
| SPNP | 4h   | -FBS/-corona | -FBS/+corona | 109.177 | 86.282  | 22.895          | 0.0571  | ns              |
|      |      | -FBS/-corona | +FBS/-corona | 109.177 | 85.978  | 23.199          | 0.0133  | *               |
|      |      | -FBS/-corona | +FBS/+corona | 109.177 | 90.923  | 18.254          | 0.0252  | *               |
|      |      | -FBS/+corona | +FBS/-corona | 86.282  | 85.978  | 0.304           | 0.9747  | ns              |
|      |      | -FBS/+corona | +FBS/+corona | 86.282  | 90.923  | -4.641          | 0.6118  | ns              |
|      |      | +FBS/-corona | +FBS/+corona | 85.978  | 90.923  | -4.945          | 0.3933  | ns              |
|      | 15h  | -FBS/-corona | -FBS/+corona | 128.520 | 102.928 | 25.592          | 0.0195  | *               |
|      |      | -FBS/-corona | +FBS/-corona | 128.520 | 101.062 | 27.458          | 0.0123  | *               |
|      |      | -FBS/-corona | +FBS/+corona | 128.520 | 94.193  | 34.327          | 0.0065  | **              |
|      |      | -FBS/+corona | +FBS/-corona | 102.928 | 101.062 | 1.866           | 0.6374  | ns              |
|      |      | -FBS/+corona | +FBS/+corona | 102.928 | 94.193  | 8.736           | 0.0311  | *               |
|      |      | +FBS/-corona | +FBS/+corona | 101.062 | 94.193  | 6.870           | 0.1405  | ns              |
| CPNP | 4h   | -FBS/-corona | -FBS/+corona | 108.325 | 84.957  | 23.368          | 0.0768  | ns              |
|      |      | -FBS/-corona | +FBS/-corona | 108.325 | 92.251  | 16.075          | 0.0564  | ns              |
|      |      | -FBS/-corona | +FBS/+corona | 108.325 | 97.417  | 10.908          | 0.1441  | ns              |
|      |      | -FBS/+corona | +FBS/-corona | 84.957  | 92.251  | -7.293          | 0.4797  | ns              |
|      |      | -FBS/+corona | +FBS/+corona | 84.957  | 97.417  | -12.460         | 0.2591  | ns              |
|      |      | +FBS/-corona | +FBS/+corona | 92.251  | 97.417  | -5.166          | 0.14    | ns              |
|      | 15h  | -FBS/-corona | -FBS/+corona | 130.606 | 112.074 | 18.532          | 0.0579  | ns              |
|      |      | -FBS/-corona | +FBS/-corona | 130.606 | 103.329 | 27.277          | 0.0014  | **              |
|      |      | -FBS/-corona | +FBS/+corona | 130.606 | 86.544  | 44.062          | 0.0092  | **              |
|      |      | -FBS/+corona | +FBS/-corona | 112.074 | 103.329 | 8.745           | 0.2733  | ns              |
|      |      | -FBS/+corona | +FBS/+corona | 112.074 | 86.544  | 25.530          | 0.0567  | ns              |
|      |      | +FBS/-corona | +FBS/+corona | 103.329 | 86.544  | 16.785          | 0.1406  | ns              |
| APNP | 4h   | -FBS/-corona | -FBS/+corona | 79.281  | 95.553  | -16.272         | 0.0307  | *               |
|      |      | -FBS/-corona | +FBS/-corona | 79.281  | 89.520  | -10.239         | 0.1827  | ns              |
|      |      | -FBS/-corona | +FBS/+corona | 79.281  | 95.867  | -16.586         | 0.0071  | **              |
|      |      | -FBS/+corona | +FBS/-corona | 95.553  | 89.520  | 6.033           | 0.443   | ns              |
|      |      | -FBS/+corona | +FBS/+corona | 95.553  | 95.867  | -0.314          | 0.9537  | ns              |
|      |      | +FBS/-corona | +FBS/+corona | 89.520  | 95.867  | -6.347          | 0.3616  | ns              |
|      | 15h  | -FBS/-corona | -FBS/+corona | 7.461   | 82.070  | -74.609         | 0.0026  | **              |
|      |      | -FBS/-corona | +FBS/-corona | 7.461   | 79.603  | -72.143         | 0       | ***             |
|      |      | -FBS/-corona | +FBS/+corona | 7.461   | 77.620  | -70.160         | 0       | ***             |
|      |      | -FBS/+corona | +FBS/-corona | 82.070  | 79.603  | 2.466           | 0.7977  | ns              |
|      |      | -FBS/+corona | +FBS/+corona | 82.070  | 77.620  | 4.449           | 0.659   | ns              |
|      |      | +FBS/-corona | +FBS/+corona | 79.603  | 77.620  | 1.983           | 0.6364  | ns              |

**Table S4.** Unpaired t-test result of viability LDH assay.

| PNP  | Time | Level 1      | Level 2      | Mean 1 | Mean 2 | Mean Difference | P-value | P value summary |
|------|------|--------------|--------------|--------|--------|-----------------|---------|-----------------|
| SPNP | 4h   | -FBS/-corona | -FBS/+corona | 2.027  | 4.817  | -2.790          | 0.1436  | ns              |
|      |      | -FBS/-corona | +FBS/-corona | 2.027  | 2.761  | -0.734          | 0.5381  | ns              |
|      |      | -FBS/-corona | +FBS/+corona | 2.027  | 4.936  | -2.909          | 0.0609  | ns              |
|      |      | -FBS/+corona | +FBS/-corona | 4.817  | 2.761  | 2.056           | 0.2105  | ns              |
|      |      | -FBS/+corona | +FBS/+corona | 4.817  | 4.936  | -0.120          | 0.9330  | ns              |
|      |      | +FBS/-corona | +FBS/+corona | 2.761  | 4.936  | -2.175          | 0.0038  | **              |
|      | 15h  | -FBS/-corona | -FBS/+corona | 1.886  | 3.119  | -1.233          | 0.3405  | ns              |
|      |      | -FBS/-corona | +FBS/-corona | 1.886  | 2.933  | -1.047          | 0.3891  | ns              |
|      |      | -FBS/-corona | +FBS/+corona | 1.886  | 1.539  | 0.347           | 0.7606  | ns              |
|      |      | -FBS/+corona | +FBS/-corona | 3.119  | 2.933  | 0.186           | 0.7614  | ns              |
|      |      | -FBS/+corona | +FBS/+corona | 3.119  | 1.539  | 1.580           | 0.0512  | ns              |
|      |      | +FBS/-corona | +FBS/+corona | 2.933  | 1.539  | 1.394           | 0.0042  | **              |
| CPNP | 4h   | -FBS/-corona | -FBS/+corona | 1.172  | 4.333  | -3.162          | 0.0497  | *               |
|      |      | -FBS/-corona | +FBS/-corona | 1.172  | 1.991  | -0.820          | 0.2184  | ns              |
|      |      | -FBS/-corona | +FBS/+corona | 1.172  | 4.970  | -3.798          | 0.0038  | **              |
|      |      | -FBS/+corona | +FBS/-corona | 4.333  | 1.991  | 2.342           | 0.1089  | ns              |
|      |      | -FBS/+corona | +FBS/+corona | 4.333  | 4.970  | -0.637          | 0.6276  | ns              |
|      |      | +FBS/-corona | +FBS/+corona | 1.991  | 4.970  | -2.979          | 0.0110  | *               |
|      | 15h  | -FBS/-corona | -FBS/+corona | 2.067  | 3.083  | -1.015          | 0.0900  | ns              |
|      |      | -FBS/-corona | +FBS/-corona | 2.067  | 1.365  | 0.702           | 0.0318  | *               |
|      |      | -FBS/-corona | +FBS/+corona | 2.067  | 1.568  | 0.499           | 0.1529  | ns              |
|      |      | -FBS/+corona | +FBS/-corona | 3.083  | 1.365  | 1.718           | 0.0202  | *               |
|      |      | -FBS/+corona | +FBS/+corona | 3.083  | 1.568  | 1.514           | 0.0278  | *               |
|      |      | +FBS/-corona | +FBS/+corona | 1.365  | 1.568  | -0.203          | 0.5045  | ns              |
| APNP | 4h   | -FBS/-corona | -FBS/+corona | 10.954 | 5.114  | 5.840           | 0.0035  | **              |
|      |      | -FBS/-corona | +FBS/-corona | 10.954 | 5.070  | 5.884           | 0.0001  | ***             |
|      |      | -FBS/-corona | +FBS/+corona | 10.954 | 5.539  | 5.415           | 0.0011  | **              |
|      |      | -FBS/+corona | +FBS/-corona | 5.114  | 5.070  | 0.044           | 0.9679  | ns              |
|      |      | -FBS/+corona | +FBS/+corona | 5.114  | 5.539  | -0.424          | 0.7267  | ns              |
|      |      | +FBS/-corona | +FBS/+corona | 5.070  | 5.539  | -0.469          | 0.5980  | ns              |
|      | 15h  | -FBS/-corona | -FBS/+corona | 44.606 | 5.766  | 38.840          | 0.0001  | ***             |
|      |      | -FBS/-corona | +FBS/-corona | 44.606 | 4.588  | 40.017          | 0.0007  | ***             |
|      |      | -FBS/-corona | +FBS/+corona | 44.606 | 4.472  | 40.133          | 0.0008  | ***             |
|      |      | -FBS/+corona | +FBS/-corona | 5.766  | 4.588  | 1.178           | 0.4884  | ns              |
|      |      | -FBS/+corona | +FBS/+corona | 5.766  | 4.472  | 1.294           | 0.4465  | ns              |
|      |      | +FBS/-corona | +FBS/+corona | 4.588  | 4.472  | 0.116           | 0.8071  | ns              |

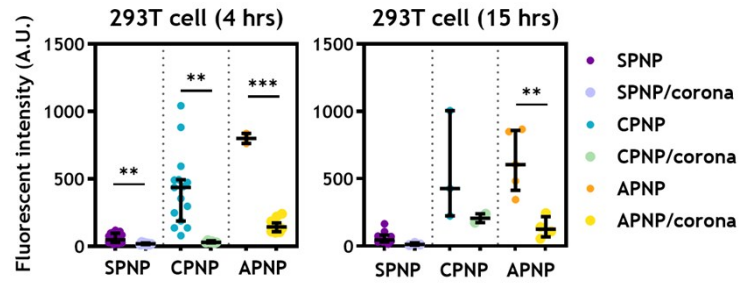

**Figure S2.** Fluorescent intensity of adsorbed nanoparticles on 293T cells after 4 h and 15 h incubation. Medians and interquartile ranges of calibrated fluorescence intensity were demonstrated along with individual values in graphs. There is no significant increase of fluorescent intensity between 4 h and 15 h. Sulfate-PNPs, carboxyl-PNPs, and amine-PNPs are denoted as SPNP, CPNP and APNP. (Unpaired t-test, \* significant at  $p < .05$ , \*\* significant at  $p < .01$ , \*\*\* significant at  $p < .001$ ).

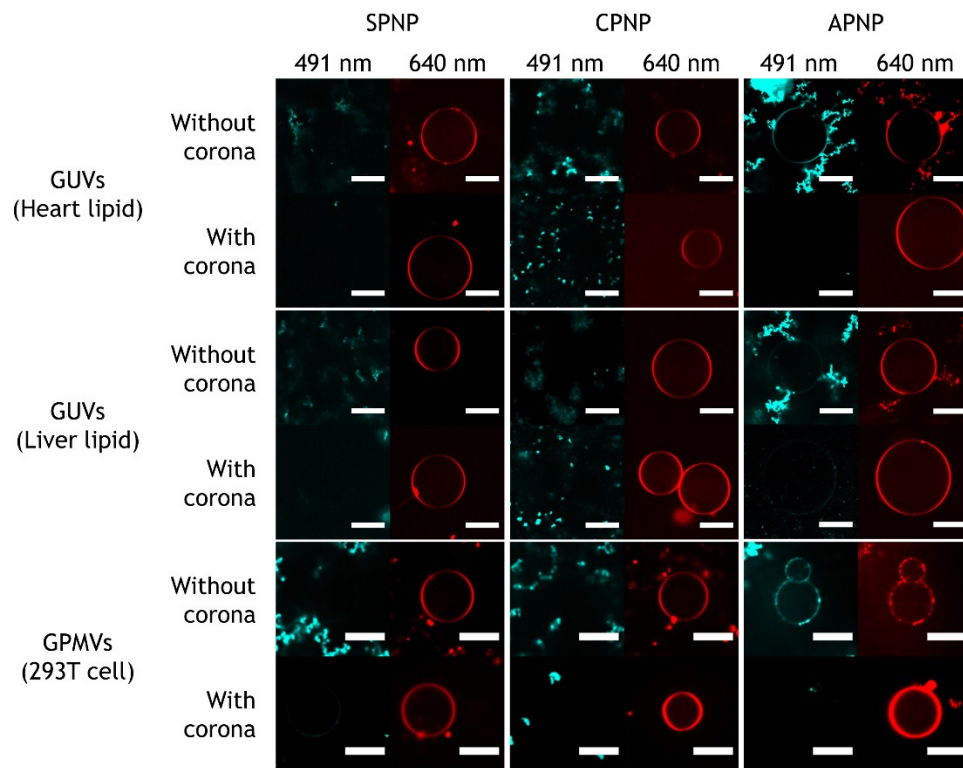

**Figure S3.** Confocal microscopy images of DiD-stained GUVs and GPMVs with green fluorescent PNPs after 4 h incubation. Scale bar in GUVs panels: 30  $\mu\text{m}$ , in GPMVs panels: 10  $\mu\text{m}$ . Sulfate-PNPs, carboxyl-PNPs, and amine-PNPs are denoted as SPNP, CPNP and APNP.

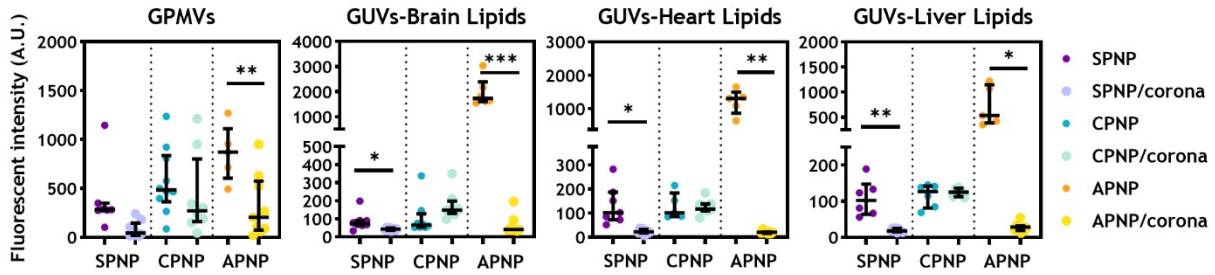

**Figure S4.** Fluorescent intensity of adsorbed nanoparticles on lipid membranes of GPMVs and GUVs after 15 h. Medians and interquartile ranges of calibrated fluorescence intensity were demonstrated along with individual values in graphs. Sulfate-PNPs, carboxyl-PNPs, and amine-PNPs are denoted as SPNP, CPNP and APNP. (Unpaired t-test, \* significant at  $p < .05$ , \*\* significant at  $p < .01$ , \*\*\* significant at  $p < .001$ ).

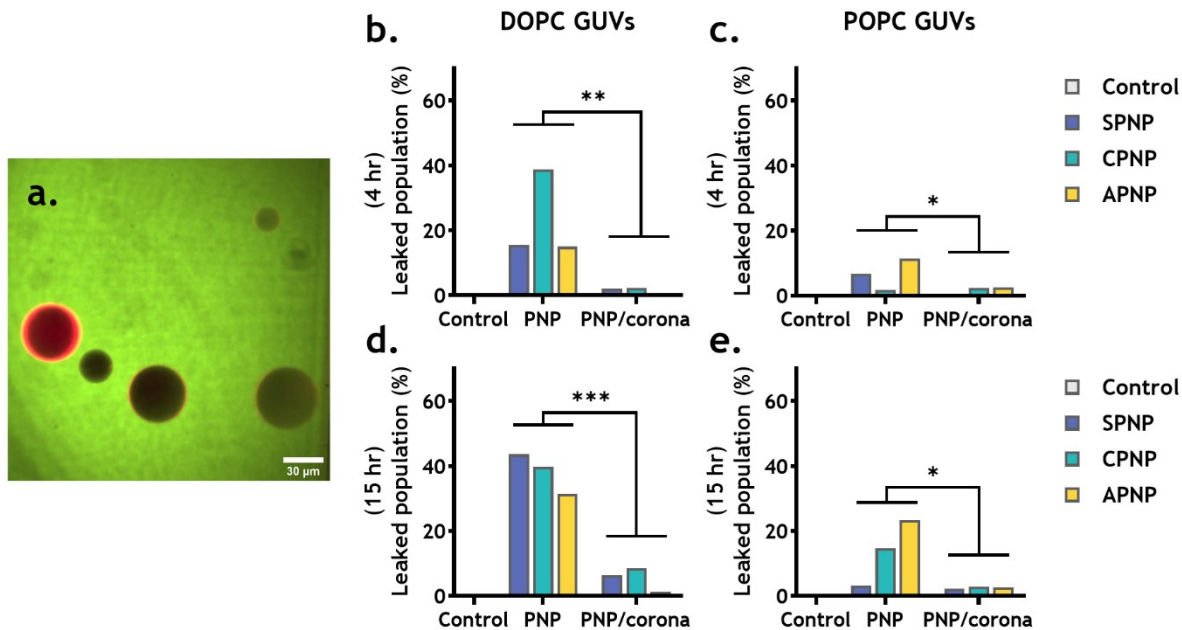

**Figure S5.** Effect of PNPs and protein corona on membrane integrity of pure lipid GUVs. DOPC GUVs and POPC GUVs were incubated with PNPs in 0.5 mg/mL calcein buffer for 4 h and 15 h. Inflow of calcein was observed after incubation with PNPs, percentages of leaked vesicles are presented in graphs accompanied with control groups where PNPs were absent. (a) Confocal microscopy image of DOPC GUVs (DiD stained, red fluorescence) in 0.5 mg/mL calcein (green fluorescence) buffer for 15 h in the absence of PNPs. (scale bar: 30  $\mu$ m). (b-e) Percentages of leaked DOPC GUVs after 4 h (b) and 15 h (d) incubation with PNPs as well as relative leaked population of POPC GUVs after 4 h (c) and 15 h (e) incubation with PNPs. The control groups in all the leakage assays showed 0% leaked population. Sulfate-PNPs, carboxyl-PNPs, and amine-PNPs are denoted as SPNP, CPNP and APNP (Unpaired t-test, \* significant at  $p < .05$ , \*\* significant at  $p < .01$ , \*\*\* significant at  $p < .001$ )



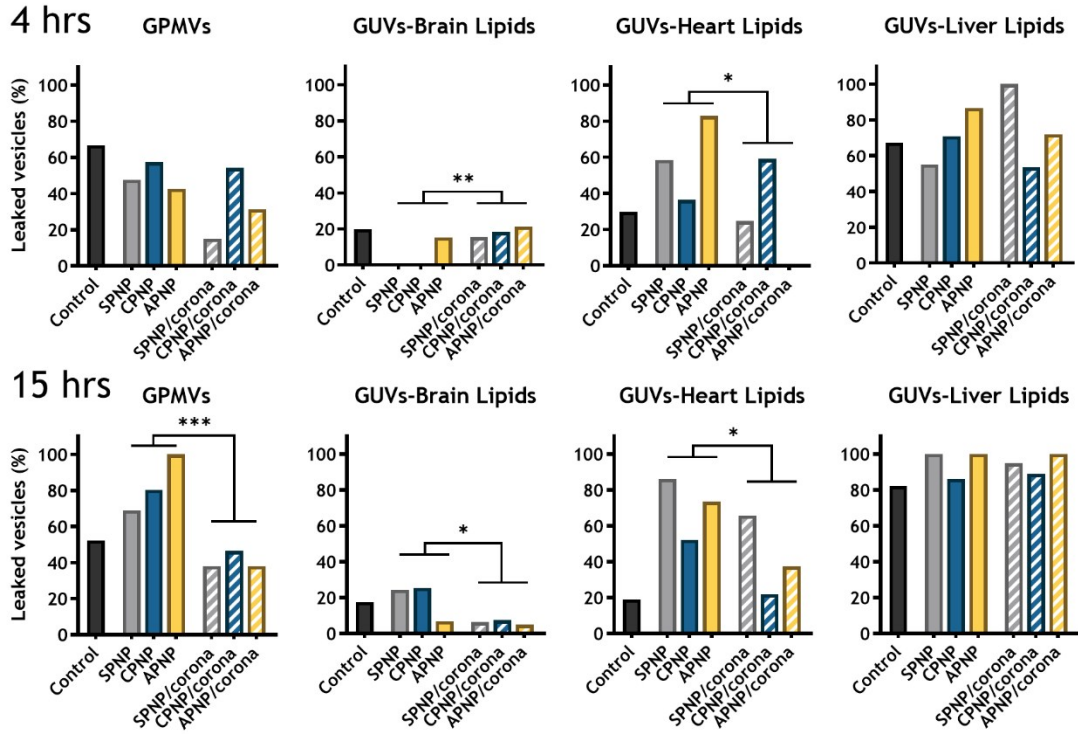

**Figure S6.** Effect of PNPs and protein corona on model membrane integrity. GPMVs and GUVs were incubated with PNPs in 0.5 mg/mL 10 kDa rhodamine-dextran buffer for 4 h and 15 h. Inflow of dextran was observed after incubation with PNPs, percentages of leaked vesicles are presented in graphs accompanied with control groups where PNPs were absent. Sulfate-PNPs, carboxyl-PNPs, and amine-PNPs are denoted as SPNP, CPNP and APNP. (Unpaired t-test, \* significant at  $p < .05$ , \*\* significant at  $p < .01$ , \*\*\* significant at  $p < .001$ )
